# Supplementary material for: Recruitment of distinct UDP‐glycosyltransferase families demonstrates dynamic evolution of chemical defense within Eucalyptus L'Hér
Source: PubMed Central journal article supplement — New Phytol. 2022 Dec 3;237(3):999–1013. doi: 10.1111/nph.18581 (PMC10107851; doi:10.1111/nph.18581), 2022-12-03
Supplement: NPH-237-999-s001.pdf [file NPH-237-999-s001.pdf]

**New Phytologist Supporting Information**

**Recruitment of distinct UDP-glycosyltransferase families demonstrates dynamic evolution of chemical defense within *Eucalyptus* L'Hér**

Cecilie Cetti Hansen, Mette Sørensen, Matteo Bellucci, Wolfgang Brandt, Carl Erik Olsen, Jason Q. D. Goodger, Ian E. Woodrow, Birger Lindberg Møller, Elizabeth H. J. Neilson

Article acceptance date: 18th October 2022



to distinct ions that appears upon transient expression of heterologous genes. **B.** Zoom on the two peaks corresponding to ions  $m/z$  441 and 318 in CYP79, CYP706 and CYP71 combination, and marked by the dashed box. Small amounts of prunasin ( $m/z$  318) accumulate when only the CYPs are co-expressed due to endogenous *N. benthamiana* UGT activity. **C.** Putatively annotated compounds related to transient expression of the prunasin pathway based on fragmentation pattern, their observed  $m/z$  values for the molecular ion related ions, biochemical knowledge and prior identification in literature (Bak *et al.*, 2000; Kristensen *et al.*, 2005; Hansen *et al.*, 2018; Thodberg *et al.*, 2018). Prunasin and putatively annotated benzoic acid glucoside are highlighted. An extended example with putative benzoic acid glucoside is shown in Figure S3. Prunasin and amygdalin were confirmed by authentic standards. For LC-ion trap spectra, only  $[M+Na]^+$  was observed. For UHPLC-QqTOF spectra, one or more of the ions  $[M+FA]^-$ ,  $[2M-H]^-$  and  $[M-H]^-$  were observed. Some derivatives (i.e. ions only displaying the  $[M+Na]^+$  adduct) were only detected by the LC-ion trap method. The aglycons in this pathway grid (i.e. mandelonitrile, benzyl alcohol etc.) were not detected by either LC-MS method.

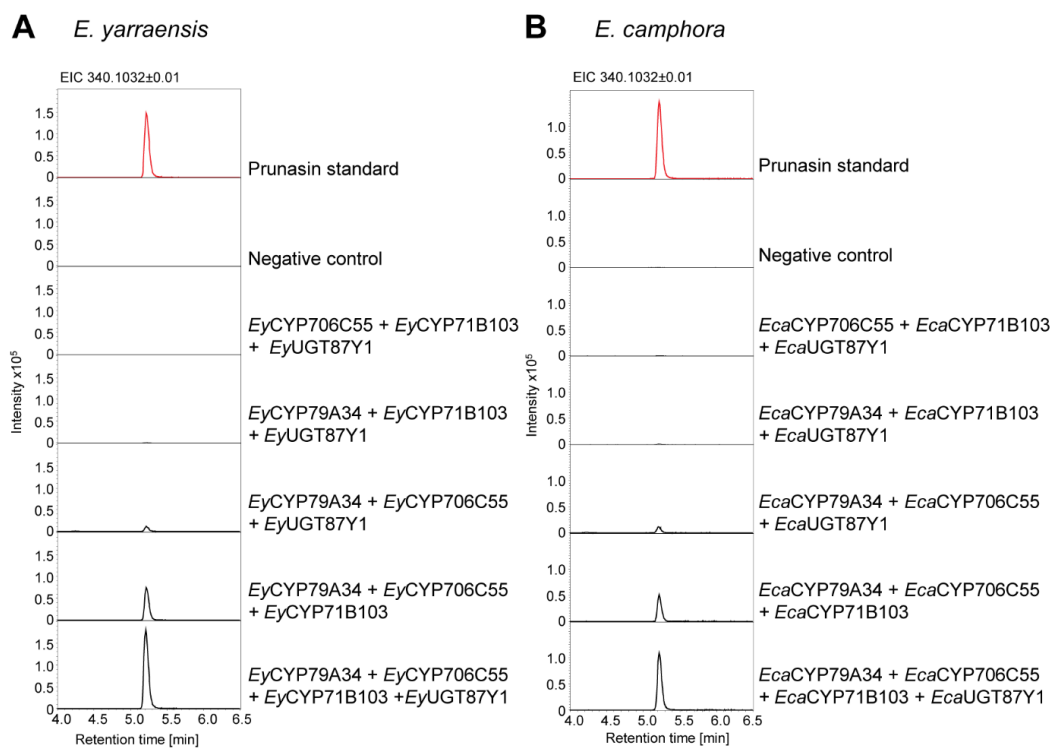

**Fig. S2.** Drop out experiment of the prunasin biosynthetic genes from *E. yarraensis* and *E. camphora*. Representative extracted ion chromatograms (EICs) showing accumulation of prunasin ( $m/z$  340.1032; [M+FA]<sup>-</sup>) in *N. benthamiana* plants transiently expressing some or all prunasin biosynthetic genes from **A.** *E. yarraensis* and **B.** *E. camphora*.

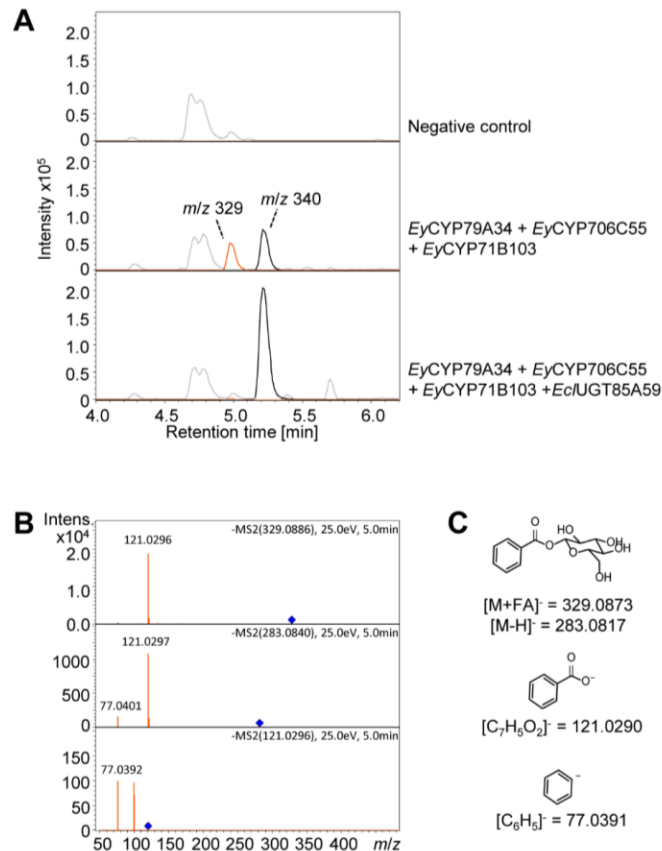

**Fig. S3.** Observation of a diagnostic fragment  $m/z$  329 putatively annotated as benzoic acid glucoside. **A.** Extracted ion chromatograms (EICs) of *N. benthamiana* extracts shows accumulation of both prunasin ( $m/z$  340.1032,  $[M+FA]$ ); black) and  $m/z$  329.0872 (orange) when only prunasin CYP genes are introduced indicating endogenous *N. benthamiana* UGT activity, but with metabolic leakage. Upon introduction of a UGT85A59, higher levels of prunasin are detected, while levels of  $m/z$  329.0873 are negligible indicating metabolic channeling when the full pathway is expressed. The base peak chromatogram is shown in light grey. **B.** MS2 spectra of the diagnostic  $m/z$  329 peak with  $rt = 5$  min. **C.** Calculated  $m/z$  values and predicted fragments for benzoic acid glucoside. Compound identification was supported by CFM-ID 4.0 (Wang *et al.*, 2021).

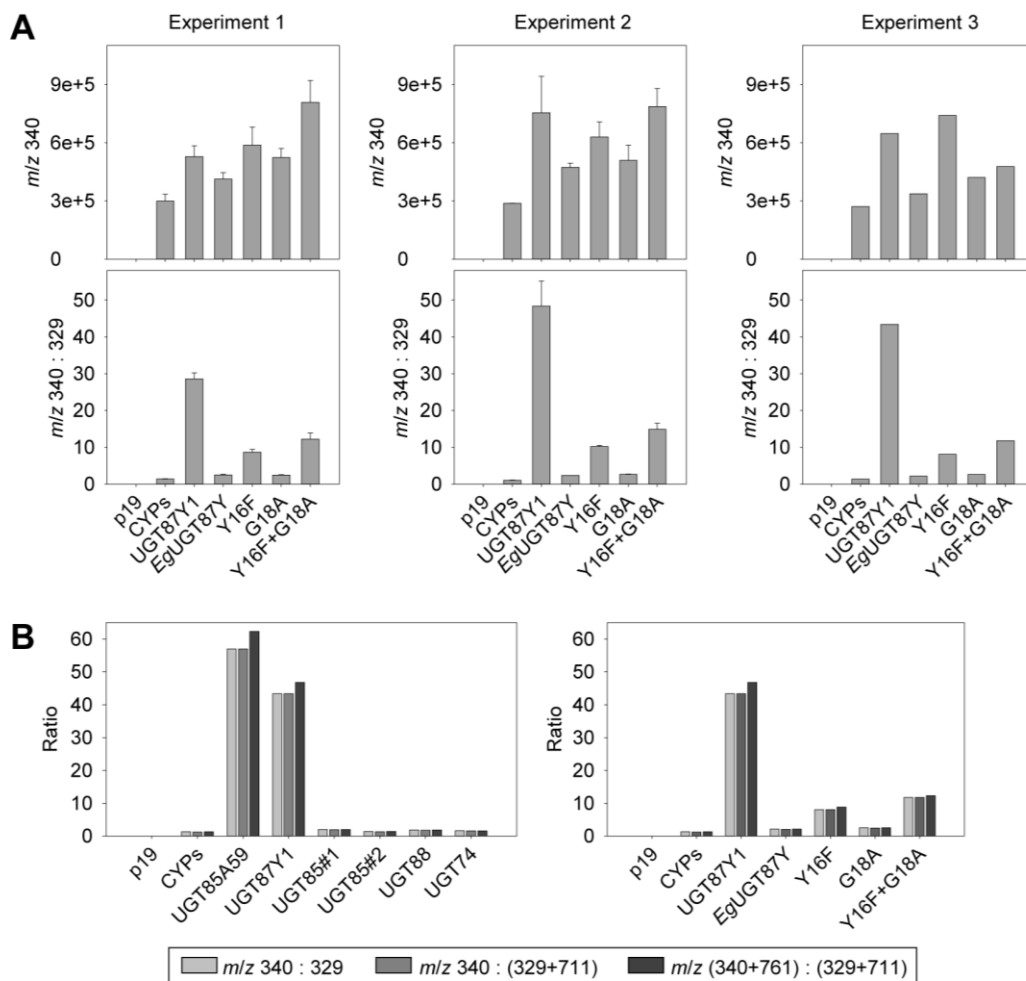

**Fig. S4.** Assessment of UGT activity using diagnostic prunasin pathway derivatives provides a consistent measure of prunasin accumulation above the background level, which is attributed to *N. benthamiana* endogenous UGT activity. **A.** Data from three independent transient expression experiments are compared, where in all experiments, UGT wild type or mutant variants were co-expressed the prunasin CYPs. Error bars show the standard error of technical replicates. Experiment three show the average of technical duplicates. Top panel: Prunasin levels ( $m/z$  340.1032, [M+FA]<sup>-</sup>) estimated as integrated area under the peak. Bottom panel: Prunasin levels normalized to the levels of putative benzoic acid glucoside ( $m/z$  329.0873, [M+FA]<sup>-</sup>) depict a high level of reproducibility between technical replicates (i.e. small error bars) and across three independent experiments. **B.** Calculation of UGT activity remains consistent when additional putative derivatives ( $m/z$  711 and  $m/z$  761) are included in the calculation. The left panel shows the test of candidate UGTs for the prunasin pathway and right panel shows the test of UGT87 mutants. The negative control (p19), the sample with the CYPs without a UGT co-expressed and the sample with UGT87Y1 co-expressed are the same in the two plots.

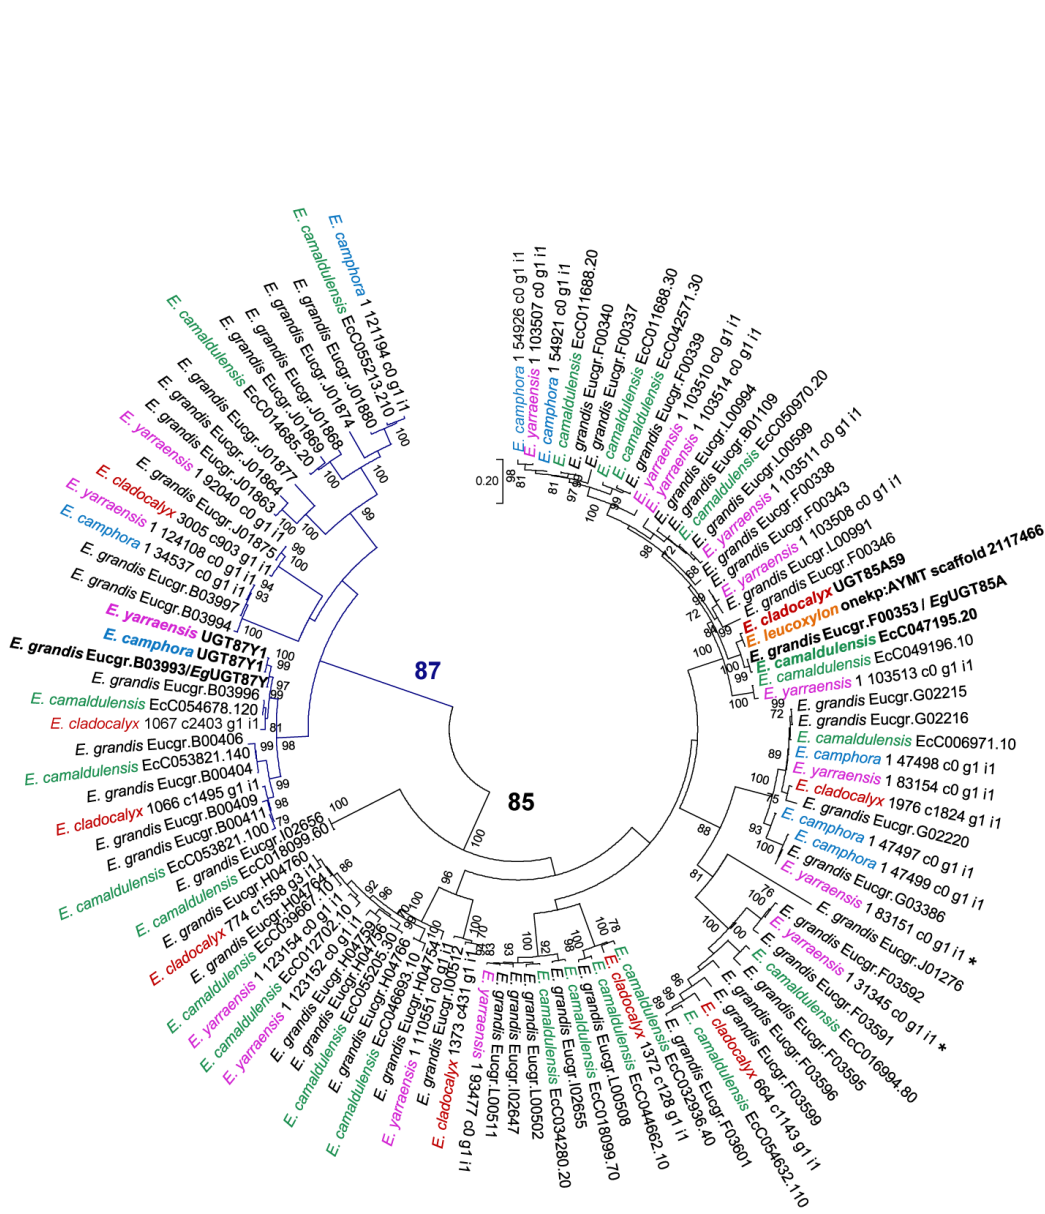

**Fig. S5.** Phylogenetic tree of UGT85 (black branches) and UGT87 (navy branches) sequences from five *Eucalyptus* species, with different colours used to differentiate species names. Amino acid sequences were aligned using MUSCLE and phylogeny was inferred using the Maximum Likelihood method with  $n=1000$  bootstrap replicates. The branch lengths are measured in number of substitutions per site. Bootstrap values  $\geq 70\%$  are shown. UGT genes characterized in this study and their closest orthologs are marked in bold. The two *E. yarraensis* UGT85s that were tested as candidates for prunasin production are marked with an asterisk.

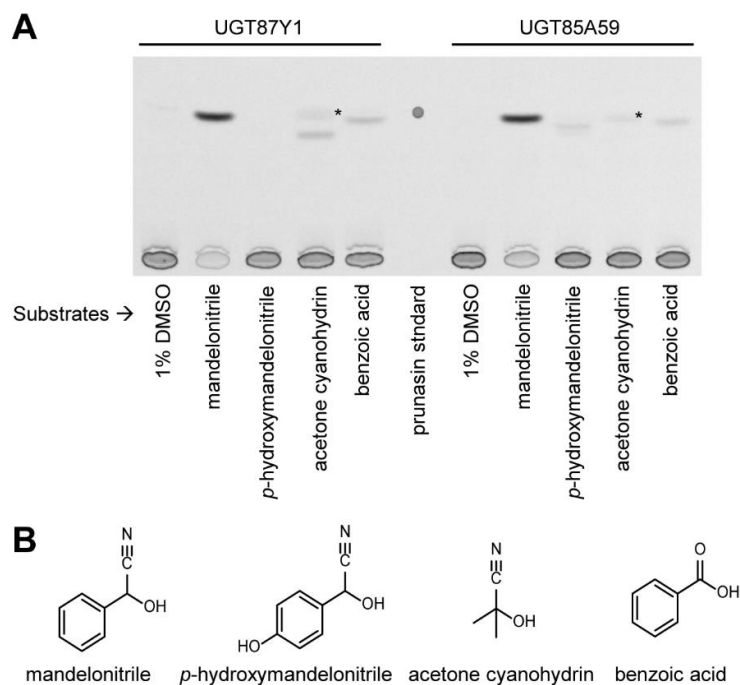

**Fig. S6.** *In vitro* assays with UGT87Y1 and UGT85A59. **A.** Thin layer chromatography plate of activity assays where UGT87Y1 and/or UGT85A59 showed activity towards the metabolite acceptor. The asterisk indicates a background signal in the assays with acetone cyanohydrin due to high substrate concentration. **B.** Structures of mandelonitrile, *p*-hydroxy mandelonitrile, acetone cyanohydrin and benzoic acid.



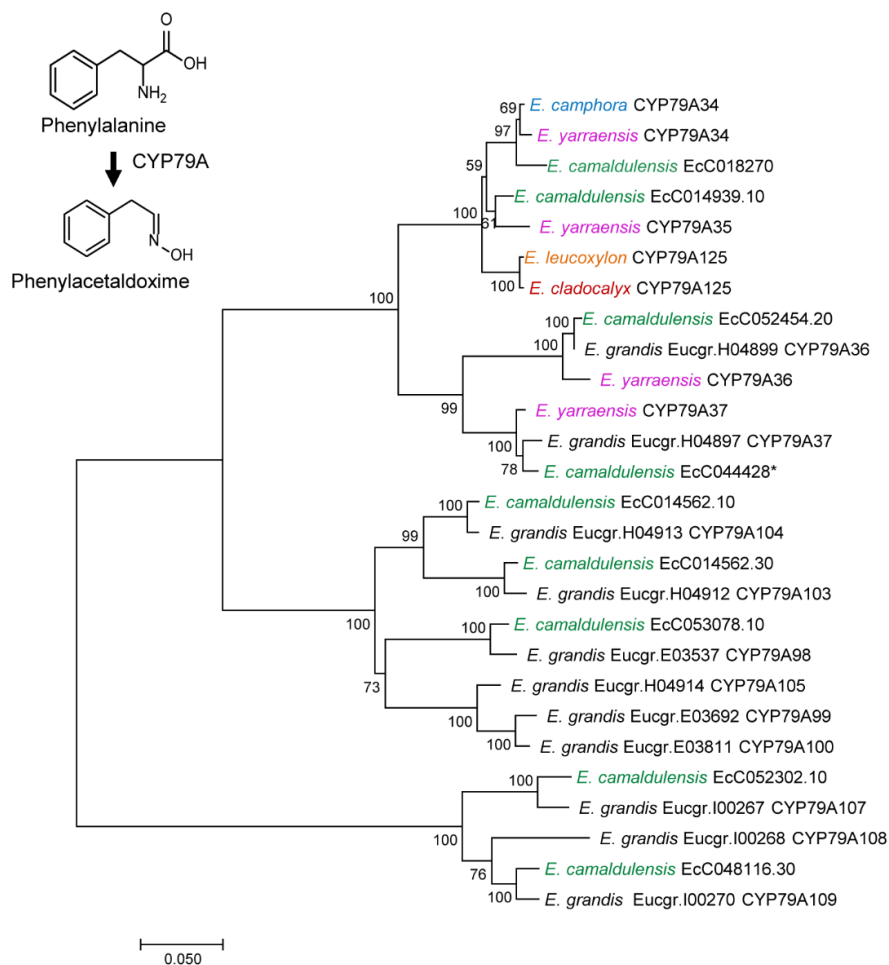

**Fig. S7.** *Eucalyptus* CYP79 phylogeny using sequences from five different species. All CYP79 members belong to the subfamily CYP79A. The first step in prunasin biosynthesis catalyzed by CYP79A enzymes is shown next to the phylogenetic tree. Full-length amino acid sequences were aligned using MUSCLE and phylogeny was inferred using the Maximum Likelihood method with  $n=1000$  bootstrap replicates. The branch lengths are measured in number of substitutions per site. \*Some reads in EcC044428 starting from amino acid #392 are missing due to low sequence quality.

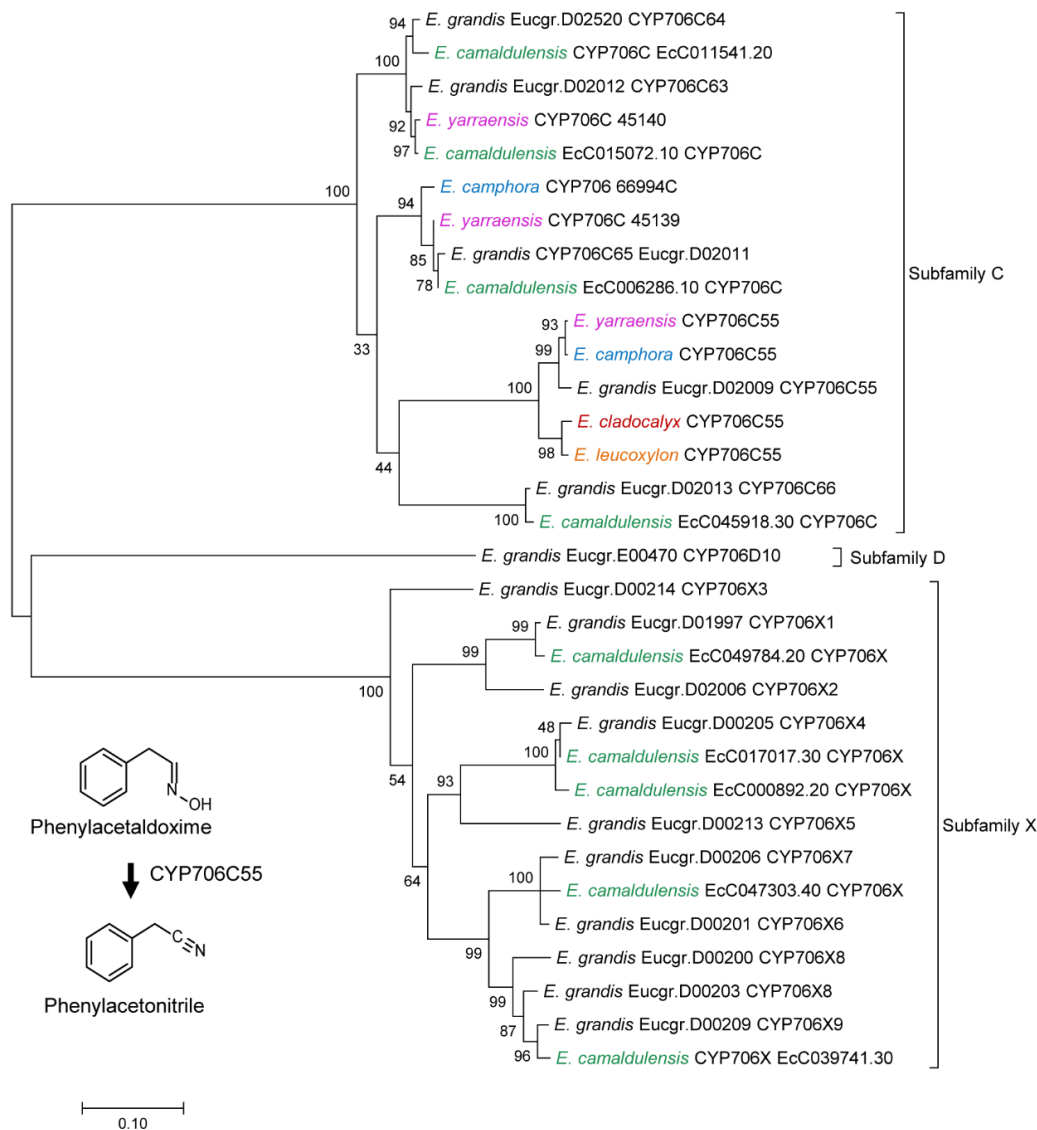

**Fig. S8.** *Eucalyptus* CYP706 phylogeny. The second step in prunasin biosynthesis catalyzed by CYP706C55 enzymes is shown next to the phylogenetic tree. Full-length amino acid sequences were aligned using MUSCLE and phylogeny was inferred using the Maximum Likelihood method with  $n=1000$  bootstrap replicates. The branch lengths are measured in number of substitutions per site.

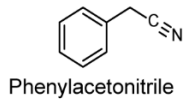

↓ CYP71B103

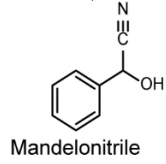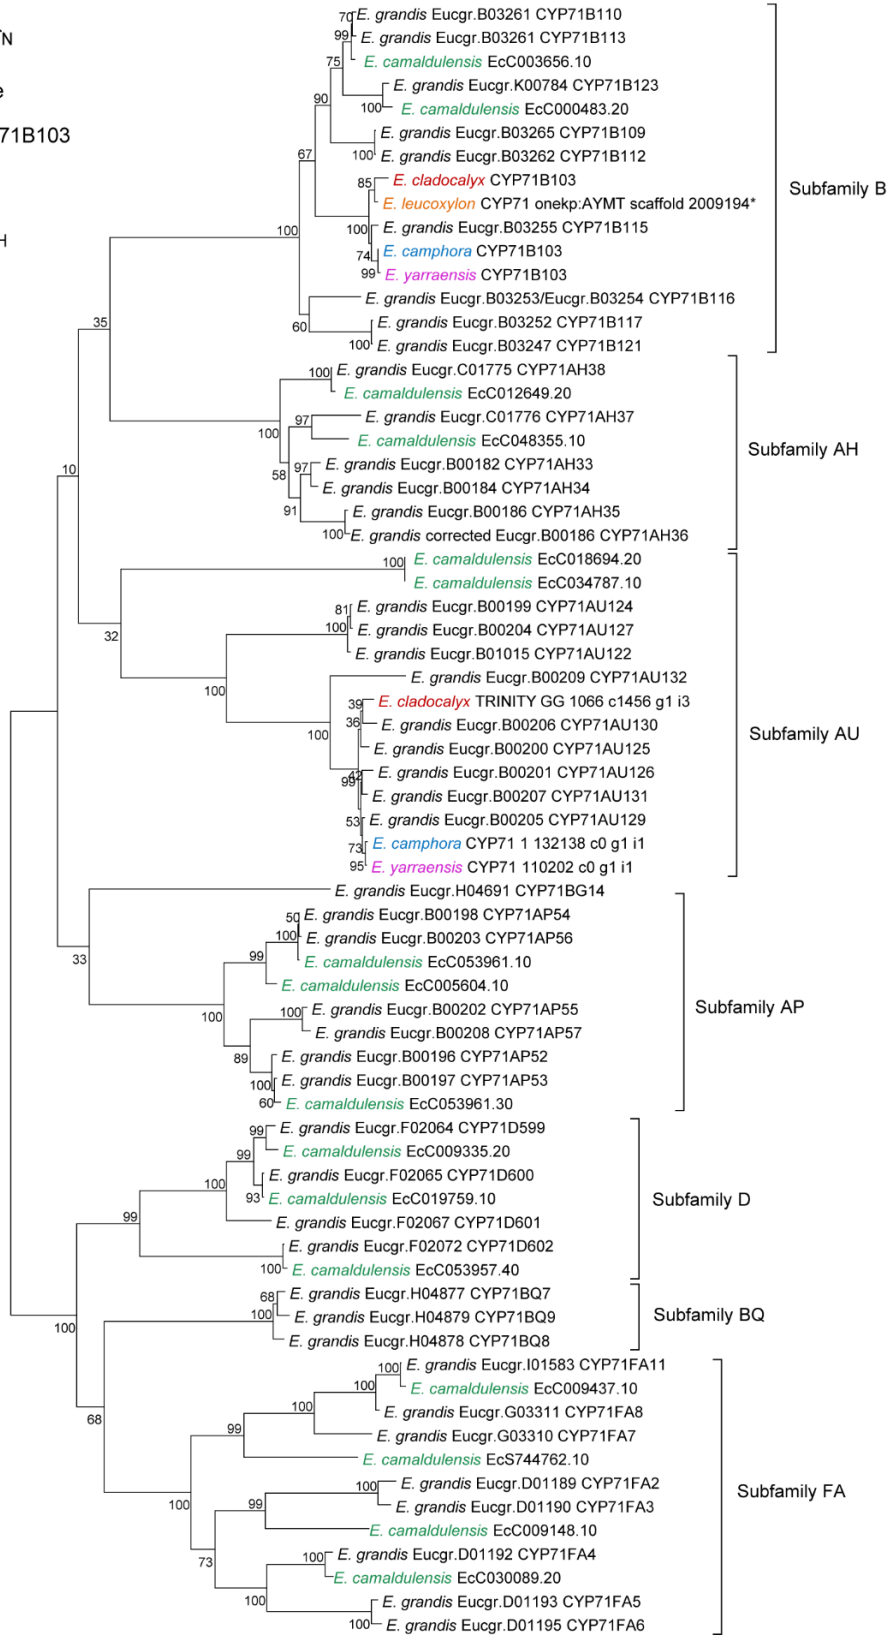

**Fig. S9.** *Eucalyptus* CYP71 phylogeny. The third step in prunasin biosynthesis catalyzed by CYP71B enzymes is shown next to the phylogenetic tree. Full-length amino acid sequences were aligned using MUSCLE and phylogeny was inferred using the Maximum Likelihood method with n=1000 bootstrap replicates. The branch lengths are measured in number of substitutions per site. \*Approximately 16 amino acids are missing from the N-terminal of CYP71 from *E. leucoxyton*.

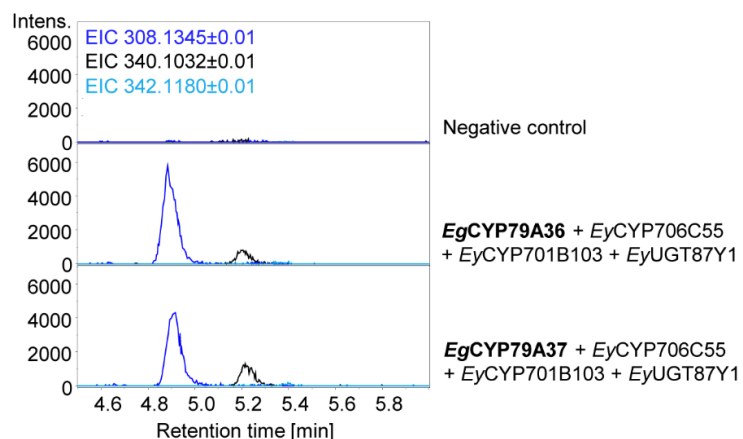

**Fig. S10.** Transient expression of *EgCYP79A36* and *EgCYP79A37* from the acyanogenic *E. grandis*. Extracted ion chromatograms (EIC) showing small levels of  $m/z$  308.1345. This compound could potentially be 3-methylbutyraldoxime (leucine-derived) or 3-methylbutyraldoxime glucoside (isoleucine-derived). Accumulation of  $m/z$  308.1345 was not detected upon co-expression of *EcICYP79A125*, *EyCYP79A34* or *EcAmCYP79A34*. The EIC of prunasin ( $m/z$  340.1032; [M+FA]<sup>-</sup>) is shown for comparison. Phenylacetaldoxime-glucoside ( $m/z$  342.1180; [M+FA]<sup>-</sup>) does not accumulate to detectable levels due to conversion of phenylacetaldoxime by downstream co-expressed prunasin pathway genes.

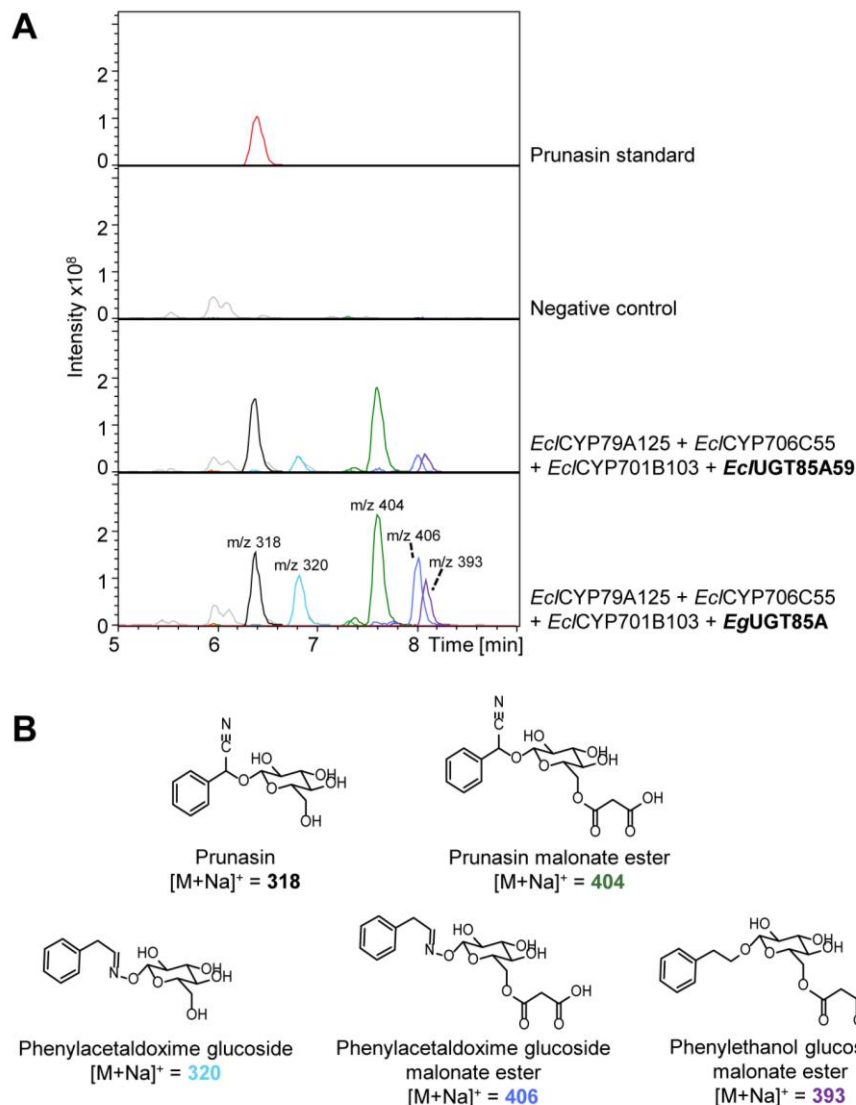

**Fig. S11.** Comparison of product profiles upon transient co-expression of *EcUGT85A59* or *EgUGT85A* with the prunasin CYPs from *E. cladocalyx*. **A.** LC-ion trap chromatograms of extracts from *N. benthamiana* leaves. The base peak chromatogram is shown in light grey and specific extracted ion chromatograms (based on [M+Na]<sup>+</sup>) are colored according to  $m/z$  value. **B.** Structures of putatively annotated compounds of the major peaks detected in the chromatograms. Presence of prunasin in the extracts was confirmed by comparison to an authentic standard. Additional compounds are predicted based on their observed  $m/z$  value for [M+Na]<sup>+</sup> adducts, MS2 fragmentation pattern and predictions from literature (Hansen *et al.*, 2018).

**Table S1.** Primers used to isolate target open reading frames from cDNA. *attB* overhangs used for subsequent Gateway recombination into pDONR207 are underlined. Abbreviations: F, forward primer; R, reverse primer.

| Gene                        | Primer sequences (5' -> 3')                                           | F/<br>R |
|-----------------------------|-----------------------------------------------------------------------|---------|
| <i>Ecam/EyCYP79</i><br>A34  | <u>GGGGACAAGTTTGTACAAAAAAGCAGGCTATGAGCTCCGCCACC</u><br>C              | F       |
| <i>Ecam/EyCYP79</i><br>A34  | <u>GGGGACCACTTTGTACAAGAAAGCTGGGTCTAAGCAAGGTAGAG</u><br>ATGACTTGG      | R       |
| <i>Ecam/EyCYP70</i><br>6C55 | <u>GGGGACAAGTTTGTACAAAAAAGCAGGCTATGTCTCCGTCCATCT</u><br>CCCT          | F       |
| <i>Ecam/EyCYP70</i><br>6C55 | <u>GGGGACCACTTTGTACAAGAAAGCTGGGTTTCATTCATAAAGCCG</u><br>AGAATCAGAGAAC | R       |
| <i>Ecam/EyCYP71</i><br>B103 | <u>GGGGACAAGTTTGTACAAAAAAGCAGGCTATGGCTCTCGACATC</u><br>CTCTTC         | F       |
| <i>Ecam/EyCYP71</i><br>B103 | <u>GGGGACCACTTTGTACAAGAAAGCTGGGTTTCATACATTGGTTTCA</u><br>TGCGATGGC    | R       |
| <i>Ecam/EyUGT87</i><br>Y1   | ATGGAGTCGAAACCCACCC                                                   | F       |
| <i>Ecam/EyUGT87</i><br>Y1   | TCATTCGGCCCTAGATATGTCAC                                               | R       |

## SI References

- Bak S, Olsen CE, Halkier BA, Møller BL. 2000.** Transgenic Tobacco and Arabidopsis Plants Expressing the Two Multifunctional Sorghum Cytochrome P450 Enzymes, CYP79A1 and CYP71E1, Are Cyanogenic and Accumulate Metabolites Derived from Intermediates in Dhurrin Biosynthesis. *Plant Physiol* **123**(4): 1437-1448.
- Hansen CC, Sørensen M, Veiga TAM, Zibrandtsen JFS, Heskens AM, Olsen CE, Boughton BA, Møller BL, Neilson EHJ. 2018.** Reconfigured Cyanogenic Glucoside Biosynthesis in *Eucalyptus cladocalyx* Involves a Cytochrome P450 CYP706C55. *Plant Physiol* **178**(3): 1081-1095.
- Kristensen C, Morant M, Olsen CE, Ekstrøm CT, Galbraith DW, Møller BL, Bak S. 2005.** Metabolic engineering of dhurrin in transgenic Arabidopsis plants with marginal inadvertent effects on the metabolome and transcriptome. *Proceedings of the National Academy of Sciences of the United States of America* **102**(5): 1779-1784.
- Thodberg S, Del Cueto J, Mazzeo R, Pavan S, Lotti C, Dicenta F, Jakobsen Neilson EH, Møller BL, Sanchez-Perez R. 2018.** Elucidation of the Amygdalin Pathway Reveals the Metabolic Basis of Bitter and Sweet Almonds (*Prunus dulcis*). *Plant Physiol* **178**(3): 1096-1111.
- Wang F, Liigand J, Tian S, Arndt D, Greiner R, Wishart DS. 2021.** CFM-ID 4.0: More Accurate ESI-MS/MS Spectral Prediction and Compound Identification. *Analytical Chemistry* **93**(34): 11692-11700.
